# Supplementary material for: Strategies to Improve Health Communication: Can Health Professionals Be Heroes?
Source: Nutrients. 2020 Jun 22;12(6):1861. doi: 10.3390/nu12061861 (PMC7353280; doi:10.3390/nu12061861)
Supplement: Supplementary file 1 [file nutrients-12-01861-s001.pdf]

# Authenticity & credibility survey\*

*\*Both profiles and posts included in the survey have been anonymized. Participants saw original posts. This study focuses on the highest performing post only (first appearing post for both the social media influencer and nutrition professional on this document).*

---

## Start of Block: Explanatory statement

### Q1.1 EXPLANATORY STATEMENT

You are invited to take part in this survey which is part of the Communicating Health Project, a Monash University and RMIT University collaboration funded by the National Health and Medical Research Council. This survey is approved by the Monash University Human Research Ethics Committee (MUHREC) project titled “Communicating Health: perceptions of social media posts’ (project ID 19201). Please read this Explanatory Statement in full before deciding whether or not to participate in this research. If you would like further information regarding any aspect of this project, you are encouraged to contact one of the researchers: Tracy McCaffrey: [tracy.mccaffrey@monash.edu](mailto:tracy.mccaffrey@monash.edu), Eva Jenkins: [eljen4@student.monash.edu](mailto:eljen4@student.monash.edu), Jasmina Ilicic: [jasmina.ilicic@monash.edu](mailto:jasmina.ilicic@monash.edu), Annika Molenaar: [annika.molenaar@monash.edu](mailto:annika.molenaar@monash.edu) We are trying to learn about how we can use social media to create and share healthy eating messages. The aim of the overall project is to understand how young adults are using social media. If you are over 18 years old, currently living in Australia and enrolled in the Monash University Department of Marketing Pilot Student Subject Pool, we would like to invite you to complete the following 20-25 minute online survey. If you decide you want to participate you will be asked your opinions on social media posts we will show you, eating, social media use, health and demographic questions including physical activity level, height and weight. The survey is anonymous and doesn’t ask you to disclose any information you could be identified with such as your name. If you decide to take part you are still free to stop at any time without giving a reason, however, your answers will not be able to be removed from the data as this survey is anonymous. If this survey brings up any issues, services available include: - Monash Nutrition Clinic for further information on your diet (has some costs involved): <https://www.monash.edu/medicine/base/about/clinics/nutrition-clinic> - Monash counselling services (only available to Monash staff and students): <https://www.monash.edu/health/counselling> - Lifeline phone line: 13 11 14 - Butterfly foundation phone line: 1800 33 4673 Data will be collected and stored on the survey software Qualtrics and stored electronically on a secure drive that only the research team has access to. Any complaints should be directed to the Executive Officer, Monash University Human Research Ethics Committee (MUHREC): Room 111, Building 3e Research Office

Monash University VIC 3800; Tel: +61 3 9905 2052; Email: [muhrec@monash.edu](mailto:muhrec@monash.edu); Fax: +61 3 9905 3831.

☐ I would like to take part and consent for my responses to be used for research purposes (1)

☐ I would not like to take part (2)

*Skip To: End of Survey If EXPLANATORY STATEMENT    You are invited to take part in this survey which is part of the Commu... = I would not like to take part*

---

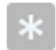

Q1.2 Please enter your subject ID: (4 digits)

---

End of Block: Explanatory statement

---

Start of Block: SMI 1 Profile

Q5.1 Please answer the following questions about this social media profile.

If you are unaware of who 'SMI'\* is, then answer based on your impression of her profile in the picture.

---

\*The social media influencers's name has been changed to 'SMI' to anonymise the person. Participants saw the real name.

Q5.2

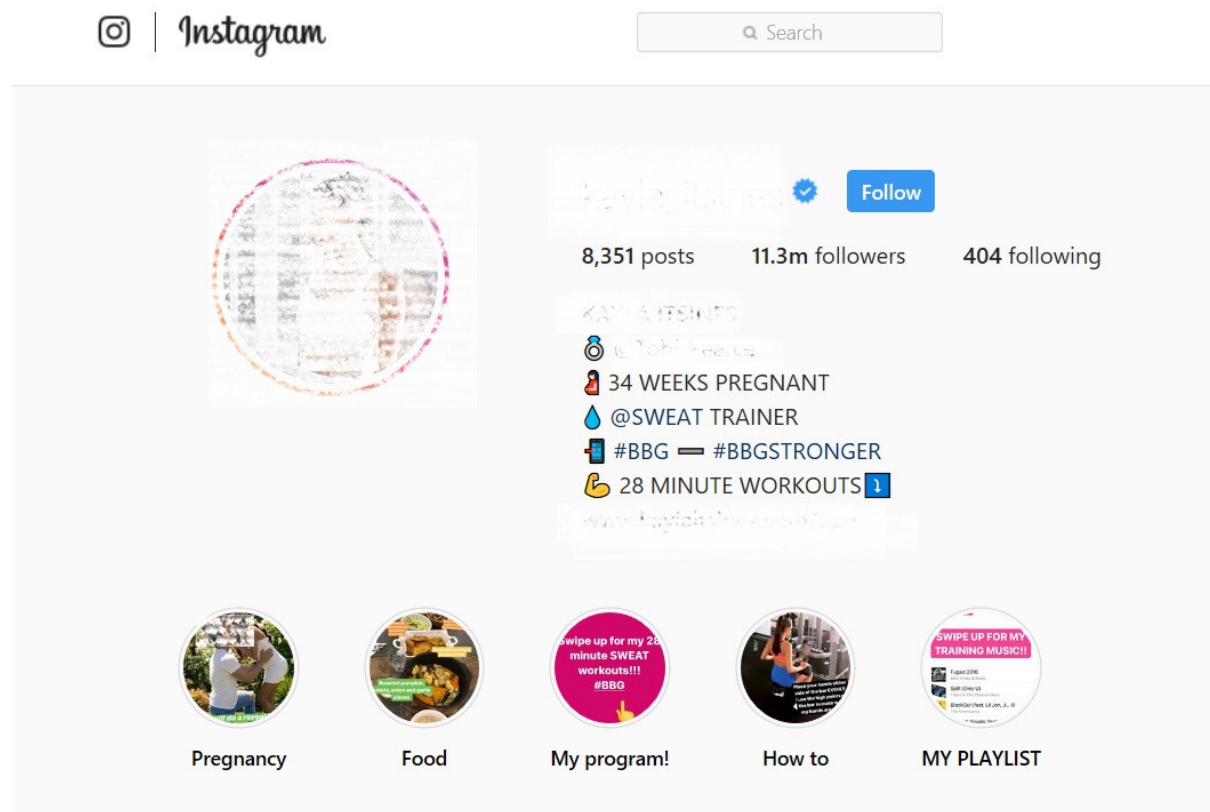

Q5.3 Please answer the following.

|                                           | Strongly disagree (1) | 2 (2)                 | 3 (3)                 | 4 (4)                 | Strongly agree (5)    |
|-------------------------------------------|-----------------------|-----------------------|-----------------------|-----------------------|-----------------------|
| I am familiar with 'SMI' (4)              | <input type="radio"/> |
| I know a lot about 'SMI' (7)              | <input type="radio"/> |
| I follow 'SMI' on social media (8)        | <input type="radio"/> |
| I read her social media posts (15)        | <input type="radio"/> |
| I find 'SMI' likeable (10)                | <input type="radio"/> |
| My impression of 'SMI' is favourable (11) | <input type="radio"/> |
| I find 'SMI' warm and friendly (12)       | <input type="radio"/> |

Q5.4

How do you feel about 'SMI'? Please rate accordingly.

|              | 1 (1)                 | 2 (2)                 | 3 (3)                 | 4 (4)                 | 5 (5)                 |            |
|--------------|-----------------------|-----------------------|-----------------------|-----------------------|-----------------------|------------|
| Unattractive | <input type="radio"/> | Attractive |
| Not classy   | <input type="radio"/> | Classy     |
| Ugly         | <input type="radio"/> | Beautiful  |
| Plain        | <input type="radio"/> | Elegant    |
| Not sexy     | <input type="radio"/> | Sexy       |

Q5.5

How do you feel about 'SMI' in regard to her understanding of nutrition? Please rate accordingly.

|                 | 1 (1)                 | 2 (2)                 | 3 (3)                 | 4 (4)                 | 5 (5)                 |               |
|-----------------|-----------------------|-----------------------|-----------------------|-----------------------|-----------------------|---------------|
| Not an expert   | <input type="radio"/> | Expert        |
| Inexperienced   | <input type="radio"/> | Experienced   |
| Unknowledgeable | <input type="radio"/> | Knowledgeable |
| Unqualified     | <input type="radio"/> | Qualified     |
| Unskilled       | <input type="radio"/> | Skilled       |

Q5.6 How much do you agree with the following statements?

|                                                         | Strongly<br>disagree (6) | 2 (7)                 | 3 (8)                 | 4 (9)                 | Strongly<br>agree (10) |
|---------------------------------------------------------|--------------------------|-----------------------|-----------------------|-----------------------|------------------------|
| I find 'SMI'<br>trustworthy (1)                         | <input type="radio"/>    | <input type="radio"/> | <input type="radio"/> | <input type="radio"/> | <input type="radio"/>  |
| She would be<br>honest in her<br>recommendations<br>(2) | <input type="radio"/>    | <input type="radio"/> | <input type="radio"/> | <input type="radio"/> | <input type="radio"/>  |
| She appears to<br>be dependable<br>(3)                  | <input type="radio"/>    | <input type="radio"/> | <input type="radio"/> | <input type="radio"/> | <input type="radio"/>  |
| She seems to be<br>sincere (4)                          | <input type="radio"/>    | <input type="radio"/> | <input type="radio"/> | <input type="radio"/> | <input type="radio"/>  |
| She appears to<br>be reliable (5)                       | <input type="radio"/>    | <input type="radio"/> | <input type="radio"/> | <input type="radio"/> | <input type="radio"/>  |

-----

Q5.7 How much do you agree with the following statements?

|                                                                                                                                 | Strongly<br>disagree (1) | 2 (2)                 | 3 (3)                 | 4 (4)                 | Strongly<br>agree (5) |
|---------------------------------------------------------------------------------------------------------------------------------|--------------------------|-----------------------|-----------------------|-----------------------|-----------------------|
| 'SMI' tries to act in a manner that is consistent with her held values, even if others criticise or reject her for doing so (1) | <input type="radio"/>    | <input type="radio"/> | <input type="radio"/> | <input type="radio"/> | <input type="radio"/> |
| 'SMI' cares about openness and honesty in close relationships with others (2)                                                   | <input type="radio"/>    | <input type="radio"/> | <input type="radio"/> | <input type="radio"/> | <input type="radio"/> |
| In general, 'SMI' places a good deal of importance on others understanding who she truly is (3)                                 | <input type="radio"/>    | <input type="radio"/> | <input type="radio"/> | <input type="radio"/> | <input type="radio"/> |
| People can count on 'SMI' being who she is regardless of the situation (4)                                                      | <input type="radio"/>    | <input type="radio"/> | <input type="radio"/> | <input type="radio"/> | <input type="radio"/> |

Q5.8 How much do you agree with the following statements?

|                                                                     | Strongly disagree (1) | 2 (2)                 | 3 (3)                 | 4 (4)                 | Strongly agree (5)    |
|---------------------------------------------------------------------|-----------------------|-----------------------|-----------------------|-----------------------|-----------------------|
| 'SMI' seems like an expert in healthy eating/diet/fitness (1)       | <input type="radio"/> |
| She is experienced in the topic of healthy eating/diet/fitness (2)  | <input type="radio"/> |
| 'SMI' is qualified to talk about and give advice on health/food (3) | <input type="radio"/> |
| She is skilled in this area of health/food/fitness (4)              | <input type="radio"/> |
| When it comes to health/food topics, 'SMI' is knowledgeable (5)     | <input type="radio"/> |

---

Page Break

End of Block: SMI 1 Profile

---

Start of Block: SMI 1 Post 1

---

Q181 Please answer the following questions about this social media post.

If you are unaware of who 'SMI' is, then answer based on your impression from the post.

Q6.1

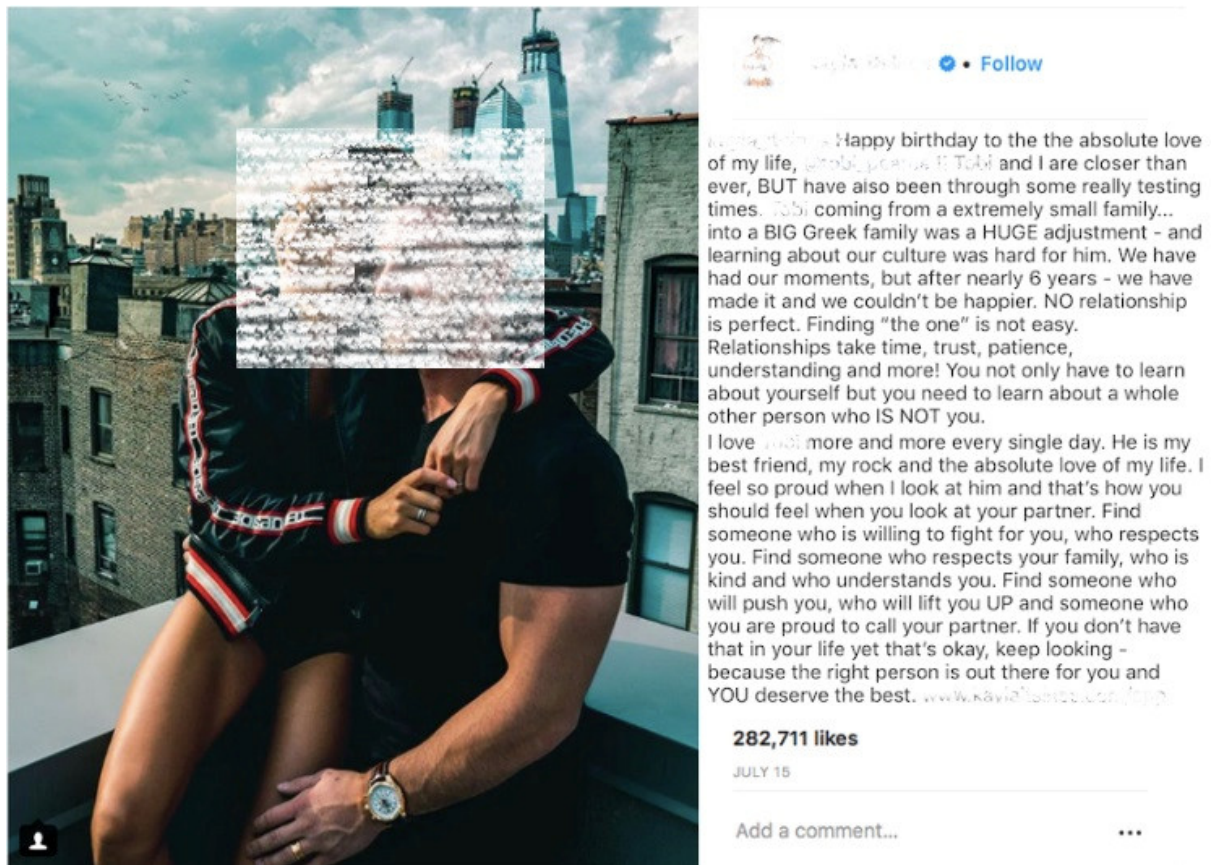

The image shows a social media post. On the left is a photograph of a man and a woman embracing on a rooftop. The man is wearing a black t-shirt and a watch, and the woman is wearing a black jacket with red and white stripes on the sleeves. In the background, a city skyline with several skyscrapers is visible under a blue sky with some clouds. A large, pixelated redaction box covers the couple's faces. On the right side of the post, there is a profile picture of a person with a bird icon, the name 'Kayla White', and a 'Follow' button. Below this is the text of the post, which is a birthday message to 'Tobi' and a long paragraph about relationships. At the bottom of the post, it says '282,711 likes', 'JULY 15', and 'Add a comment...' with a three-dot menu icon.

Kayla White • Follow

Happy birthday to the the absolute love of my life, ~~who's name is Tobi~~ and I are closer than ever, BUT have also been through some really testing times. ~~Tobi~~ coming from a extremely small family... into a BIG Greek family was a HUGE adjustment - and learning about our culture was hard for him. We have had our moments, but after nearly 6 years - we have made it and we couldn't be happier. NO relationship is perfect. Finding "the one" is not easy. Relationships take time, trust, patience, understanding and more! You not only have to learn about yourself but you need to learn about a whole other person who IS NOT you. I love ~~and~~ more and more every single day. He is my best friend, my rock and the absolute love of my life. I feel so proud when I look at him and that's how you should feel when you look at your partner. Find someone who is willing to fight for you, who respects you. Find someone who respects your family, who is kind and who understands you. Find someone who will push you, who will lift you UP and someone who you are proud to call your partner. If you don't have that in your life yet that's okay, keep looking - because the right person is out there for you and YOU deserve the best. [www.kayla-white.com/blog](http://www.kayla-white.com/blog)

282,711 likes

JULY 15

Add a comment...

Q6.2 Which emotions do you feel after seeing/reading this post?

|                                                                                                            | Strongly disagree (1) | 2 (2)                 | 3 (3)                 | 4 (4)                 | Strongly agree (5)    |
|------------------------------------------------------------------------------------------------------------|-----------------------|-----------------------|-----------------------|-----------------------|-----------------------|
| <b>Affiliation:</b> Feelings of love, belonging and togetherness (1)                                       | <input type="radio"/> |
| <b>Hope:</b> Feelings of hope and reassurance (2)                                                          | <input type="radio"/> |
| <b>Humour:</b> Feelings of fun, happiness, laughter, joy, light-heartedness, cheerfulness, comedy (3)      | <input type="radio"/> |
| <b>Heroic/successful:</b> Feelings of bravery, nobility, admiration (4)                                    | <input type="radio"/> |
| <b>Ease/convenience:</b> Feeling that little effort is required to engage in the behaviour in the post (6) | <input type="radio"/> |
| <b>Guilt/shame:</b> Feelings of shame and remorse (7)                                                      | <input type="radio"/> |
| <b>Sorrow:</b> Feelings of sadness, worry, loss, misery and unhappiness (8)                                | <input type="radio"/> |
| <b>Fear:</b> Feelings of terror, dread, anxiety, panic and alarm (9)                                       | <input type="radio"/> |

Q6.3 Looking/reading this social media post, what do you think 'SMI' is trying to achieve? How much do you agree with the following statements?

|                                                                                           | Strongly disagree (1) | 2 (2)                 | 3 (3)                 | 4 (4)                 | Strongly agree (5)    |
|-------------------------------------------------------------------------------------------|-----------------------|-----------------------|-----------------------|-----------------------|-----------------------|
| 'SMI' is trying to sell me something (1)                                                  | <input type="radio"/> |
| 'SMI' is encouraging me to do something, such as changing my behaviour for the better (2) | <input type="radio"/> |
| 'SMI' is sharing her opinion and feelings about something (3)                             | <input type="radio"/> |
| 'SMI' is providing me with useful information and facts about health/food (4)             | <input type="radio"/> |

Q6.4 How much do you agree with the following statements?

|                                                         | Strongly<br>disagree (1) | 2 (2)                 | 3 (3)                 | 4 (4)                 | Strongly<br>agree (5) |
|---------------------------------------------------------|--------------------------|-----------------------|-----------------------|-----------------------|-----------------------|
| The image<br>used for this<br>post is<br>attractive (1) | <input type="radio"/>    | <input type="radio"/> | <input type="radio"/> | <input type="radio"/> | <input type="radio"/> |
| I find this<br>post classy<br>(2)                       | <input type="radio"/>    | <input type="radio"/> | <input type="radio"/> | <input type="radio"/> | <input type="radio"/> |
| This post is<br>plain (3)                               | <input type="radio"/>    | <input type="radio"/> | <input type="radio"/> | <input type="radio"/> | <input type="radio"/> |
| The image<br>used for this<br>post is sexy<br>(4)       | <input type="radio"/>    | <input type="radio"/> | <input type="radio"/> | <input type="radio"/> | <input type="radio"/> |
| I find the<br>image in this<br>post beautiful<br>(5)    | <input type="radio"/>    | <input type="radio"/> | <input type="radio"/> | <input type="radio"/> | <input type="radio"/> |

---

Q6.5 How much do you agree with the following statements?

|                                                           | Strongly disagree (1) | 2 (2)                 | 3 (3)                 | 4 (4)                 | Strongly agree (5)    |
|-----------------------------------------------------------|-----------------------|-----------------------|-----------------------|-----------------------|-----------------------|
| The content of this post seems dependable (1)             | <input type="radio"/> |
| I find the information provided in this post reliable (2) | <input type="radio"/> |
| This post is being honest in its recommendations (3)      | <input type="radio"/> |
| This post seems sincere (4)                               | <input type="radio"/> |
| I trust the information provided in this post (5)         | <input type="radio"/> |

Q6.6 How much do you agree with the following statements?

|                                               | Strongly disagree (1) | 2 (2)                 | 3 (3)                 | 4 (4)                 | Strongly agree (5)    |
|-----------------------------------------------|-----------------------|-----------------------|-----------------------|-----------------------|-----------------------|
| The content in this post is genuine (1)       | <input type="radio"/> |
| The content in this post seems real to me (2) | <input type="radio"/> |
| This content in this post is authentic (3)    | <input type="radio"/> |

Q6.7 What emotions do you think the post is trying to show?

|                                                                                                            | Strongly<br>disagree (1) | 2 (2)                 | 3 (3)                 | 4 (4)                 | Strongly<br>agree (5) |
|------------------------------------------------------------------------------------------------------------|--------------------------|-----------------------|-----------------------|-----------------------|-----------------------|
| <b>Affiliation:</b> Feelings of love, belonging and togetherness (1)                                       | <input type="radio"/>    | <input type="radio"/> | <input type="radio"/> | <input type="radio"/> | <input type="radio"/> |
| <b>Hope:</b> Feelings of hope and reassurance (2)                                                          | <input type="radio"/>    | <input type="radio"/> | <input type="radio"/> | <input type="radio"/> | <input type="radio"/> |
| <b>Humour:</b> Feelings of fun, happiness, laughter, joy, light-heartedness, cheerfulness, comedy (3)      | <input type="radio"/>    | <input type="radio"/> | <input type="radio"/> | <input type="radio"/> | <input type="radio"/> |
| <b>Heroism/success:</b> Feelings of bravery, nobility, admiration (4)                                      | <input type="radio"/>    | <input type="radio"/> | <input type="radio"/> | <input type="radio"/> | <input type="radio"/> |
| <b>Ease/convenience:</b> Feeling that little effort is required to engage in the behaviour in the post (6) | <input type="radio"/>    | <input type="radio"/> | <input type="radio"/> | <input type="radio"/> | <input type="radio"/> |
| <b>Guilt/shame:</b> Feelings of shame and remorse (7)                                                      | <input type="radio"/>    | <input type="radio"/> | <input type="radio"/> | <input type="radio"/> | <input type="radio"/> |
| <b>Sorrow:</b> Feelings of sadness, worry, loss, misery and unhappiness (8)                                | <input type="radio"/>    | <input type="radio"/> | <input type="radio"/> | <input type="radio"/> | <input type="radio"/> |
| <b>Fear:</b> Feelings of terror, dread, anxiety, panic and alarm (9)                                       | <input type="radio"/>    | <input type="radio"/> | <input type="radio"/> | <input type="radio"/> | <input type="radio"/> |

End of Block: SMI 1 Post 1

Start of Block: SMI 1 Post 2

Q182 Please answer the following questions about this social media post.

If you are unaware of who 'SMI' is, then answer based on your impression from the post.

Q7.1

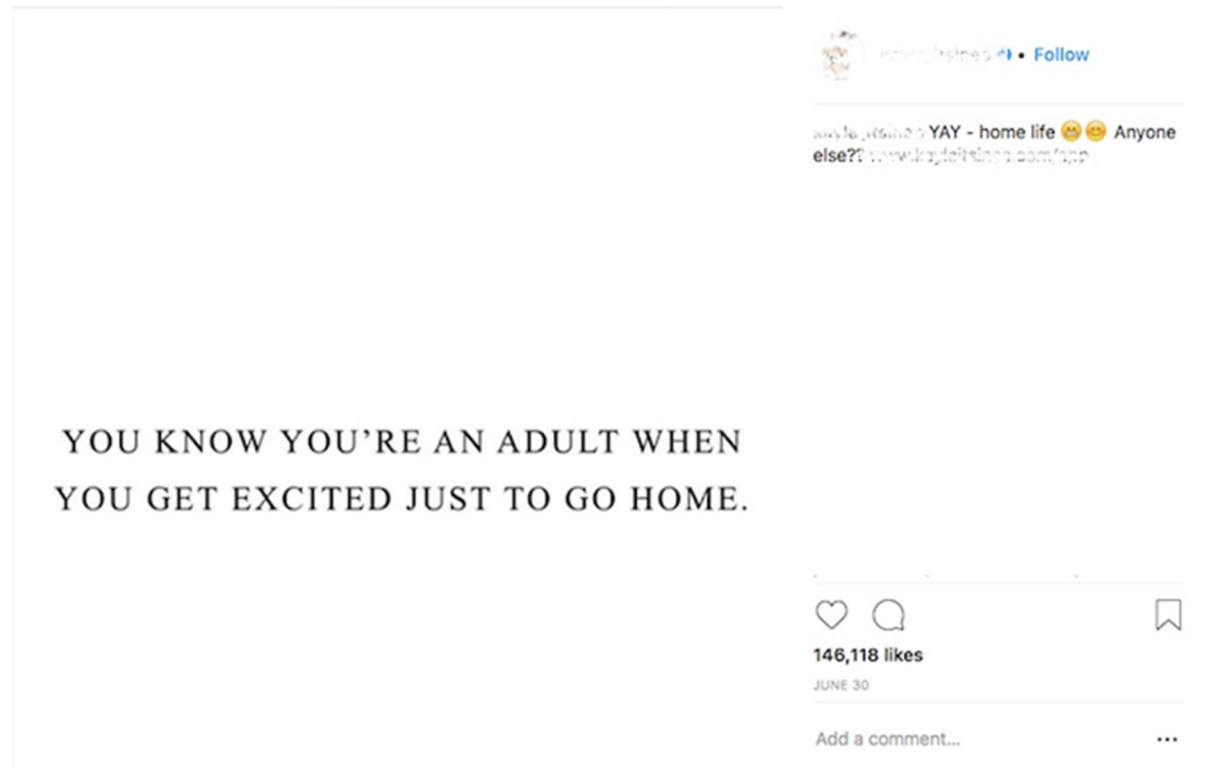

Q7.2 Which emotions do you feel after seeing/reading this post?

|                                                                                                            | Strongly<br>disagree (1) | 2 (2)                 | 3 (3)                 | 4 (4)                 | Strongly<br>agree (5) |
|------------------------------------------------------------------------------------------------------------|--------------------------|-----------------------|-----------------------|-----------------------|-----------------------|
| <b>Affiliation:</b> Feelings of love, belonging and togetherness (1)                                       | <input type="radio"/>    | <input type="radio"/> | <input type="radio"/> | <input type="radio"/> | <input type="radio"/> |
| <b>Hope:</b> Feelings of hope and reassurance (2)                                                          | <input type="radio"/>    | <input type="radio"/> | <input type="radio"/> | <input type="radio"/> | <input type="radio"/> |
| <b>Humour:</b> Feelings of fun, happiness, laughter, joy, light-heartedness, cheerfulness, comedy (3)      | <input type="radio"/>    | <input type="radio"/> | <input type="radio"/> | <input type="radio"/> | <input type="radio"/> |
| <b>Heroic/successful:</b> Feelings of bravery, nobility, admiration (4)                                    | <input type="radio"/>    | <input type="radio"/> | <input type="radio"/> | <input type="radio"/> | <input type="radio"/> |
| <b>Ease/convenience:</b> Feeling that little effort is required to engage in the behaviour in the post (6) | <input type="radio"/>    | <input type="radio"/> | <input type="radio"/> | <input type="radio"/> | <input type="radio"/> |
| <b>Guilt/shame:</b> Feelings of shame and remorse (7)                                                      | <input type="radio"/>    | <input type="radio"/> | <input type="radio"/> | <input type="radio"/> | <input type="radio"/> |
| <b>Sorrow:</b> Feelings of sadness, worry, loss, misery and unhappiness (8)                                | <input type="radio"/>    | <input type="radio"/> | <input type="radio"/> | <input type="radio"/> | <input type="radio"/> |
| <b>Fear:</b> Feelings of terror, dread, anxiety, panic and alarm (9)                                       | <input type="radio"/>    | <input type="radio"/> | <input type="radio"/> | <input type="radio"/> | <input type="radio"/> |

Q7.3 Looking/reading this social media post, what do you think 'SMI' is trying to achieve? How much do you agree with the following statements?

|                                                                                           | Strongly disagree (1) | 2 (2)                 | 3 (3)                 | 4 (4)                 | Strongly agree (5)    |
|-------------------------------------------------------------------------------------------|-----------------------|-----------------------|-----------------------|-----------------------|-----------------------|
| 'SMI' is trying to sell me something (1)                                                  | <input type="radio"/> |
| 'SMI' is encouraging me to do something, such as changing my behaviour for the better (2) | <input type="radio"/> |
| 'SMI' is sharing her opinion and feelings about something (3)                             | <input type="radio"/> |
| 'SMI' is providing me with useful information and facts about health/food (4)             | <input type="radio"/> |

Q7.4 How much do you agree with the following statements?

|                                                         | Strongly<br>disagree (1) | 2 (2)                 | 3 (3)                 | 4 (4)                 | Strongly<br>agree (5) |
|---------------------------------------------------------|--------------------------|-----------------------|-----------------------|-----------------------|-----------------------|
| The image<br>used for this<br>post is<br>attractive (1) | <input type="radio"/>    | <input type="radio"/> | <input type="radio"/> | <input type="radio"/> | <input type="radio"/> |
| I find this<br>post classy<br>(2)                       | <input type="radio"/>    | <input type="radio"/> | <input type="radio"/> | <input type="radio"/> | <input type="radio"/> |
| This post is<br>plain (3)                               | <input type="radio"/>    | <input type="radio"/> | <input type="radio"/> | <input type="radio"/> | <input type="radio"/> |
| The image<br>used for this<br>post is sexy<br>(4)       | <input type="radio"/>    | <input type="radio"/> | <input type="radio"/> | <input type="radio"/> | <input type="radio"/> |
| I find the<br>image in this<br>post beautiful<br>(5)    | <input type="radio"/>    | <input type="radio"/> | <input type="radio"/> | <input type="radio"/> | <input type="radio"/> |

-----

Q7.5 How much do you agree with the following statements?

|                                                           | Strongly disagree (1) | 2 (2)                 | 3 (3)                 | 4 (4)                 | Strongly agree (5)    |
|-----------------------------------------------------------|-----------------------|-----------------------|-----------------------|-----------------------|-----------------------|
| The content of this post seems dependable (1)             | <input type="radio"/> |
| I find the information provided in this post reliable (2) | <input type="radio"/> |
| This post is being honest in its recommendations (3)      | <input type="radio"/> |
| This post seems sincere (4)                               | <input type="radio"/> |
| I trust the information provided in this post (5)         | <input type="radio"/> |

Q7.6 How much do you agree with the following statements?

|                                               | Strongly disagree (1) | 2 (2)                 | 3 (3)                 | 4 (4)                 | Strongly agree (5)    |
|-----------------------------------------------|-----------------------|-----------------------|-----------------------|-----------------------|-----------------------|
| The content in this post is genuine (1)       | <input type="radio"/> |
| The content in this post seems real to me (2) | <input type="radio"/> |
| This content in this post is authentic (3)    | <input type="radio"/> |

Q7.7 What emotions do you think the post is trying to show?

|                                                                                                            | Strongly<br>disagree (1) | 2 (2)                 | 3 (3)                 | 4 (4)                 | Strongly<br>agree (5) |
|------------------------------------------------------------------------------------------------------------|--------------------------|-----------------------|-----------------------|-----------------------|-----------------------|
| <b>Affiliation:</b> Feelings of love, belonging and togetherness (1)                                       | <input type="radio"/>    | <input type="radio"/> | <input type="radio"/> | <input type="radio"/> | <input type="radio"/> |
| <b>Hope:</b> Feelings of hope and reassurance (2)                                                          | <input type="radio"/>    | <input type="radio"/> | <input type="radio"/> | <input type="radio"/> | <input type="radio"/> |
| <b>Humour:</b> Feelings of fun, happiness, laughter, joy, light-heartedness, cheerfulness, comedy (3)      | <input type="radio"/>    | <input type="radio"/> | <input type="radio"/> | <input type="radio"/> | <input type="radio"/> |
| <b>Heroism/success:</b> Feelings of bravery, nobility, admiration (4)                                      | <input type="radio"/>    | <input type="radio"/> | <input type="radio"/> | <input type="radio"/> | <input type="radio"/> |
| <b>Ease/convenience:</b> Feeling that little effort is required to engage in the behaviour in the post (6) | <input type="radio"/>    | <input type="radio"/> | <input type="radio"/> | <input type="radio"/> | <input type="radio"/> |
| <b>Guilt/shame:</b> Feelings of shame and remorse (7)                                                      | <input type="radio"/>    | <input type="radio"/> | <input type="radio"/> | <input type="radio"/> | <input type="radio"/> |
| <b>Sorrow:</b> Feelings of sadness, worry, loss, misery and unhappiness (8)                                | <input type="radio"/>    | <input type="radio"/> | <input type="radio"/> | <input type="radio"/> | <input type="radio"/> |
| <b>Fear:</b> Feelings of terror, dread, anxiety, panic and alarm (9)                                       | <input type="radio"/>    | <input type="radio"/> | <input type="radio"/> | <input type="radio"/> | <input type="radio"/> |

End of Block: SMI 1 Post 2

Start of Block: NutrProf 1 Profile

Q2.1 Please answer the following questions about this social media profile.

If you are unaware of who 'NP' is, then answer based on your impression of her profile in the picture.

\*NP has been used to anonymize the profile for the purposes of this document. Participants saw the original version.

---

Q2.2

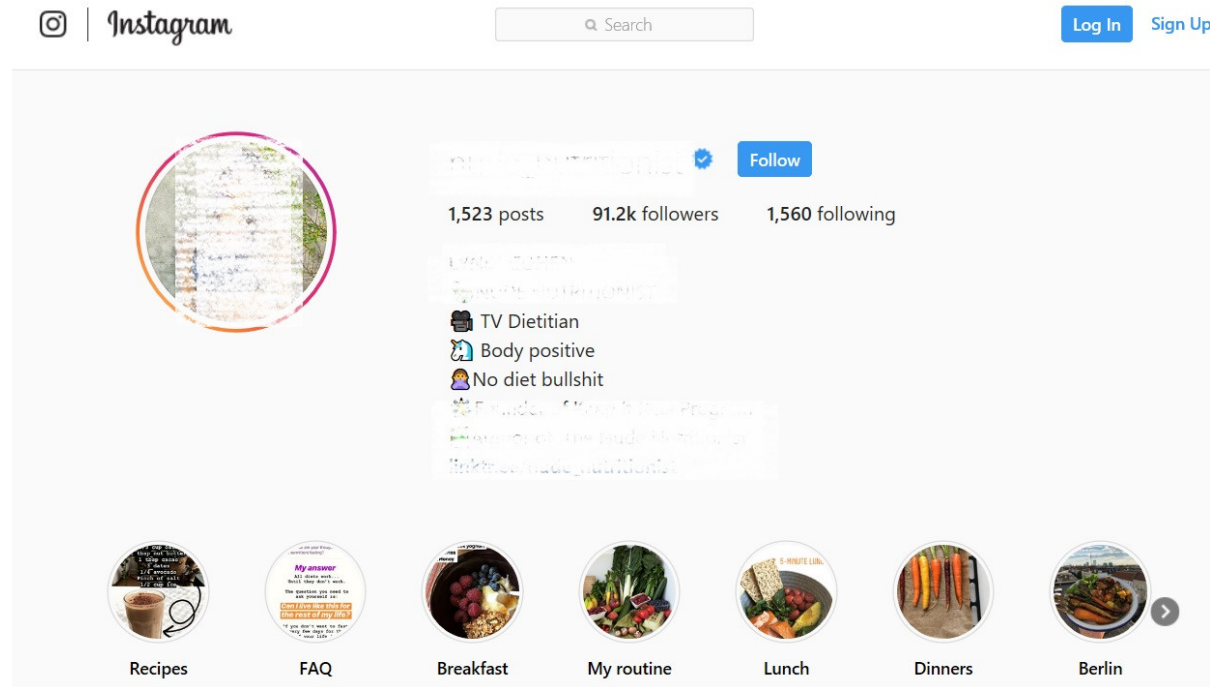

Q2.3 Please answer the following.

|                                          | Strongly disagree (1) | 2 (2)                 | 3 (3)                 | 4 (4)                 | Strongly agree (5)    |
|------------------------------------------|-----------------------|-----------------------|-----------------------|-----------------------|-----------------------|
| I am familiar with 'NP' (4)              | <input type="radio"/> |
| I know a lot about 'NP' (7)              | <input type="radio"/> |
| I follow 'NP' on social media (8)        | <input type="radio"/> |
| I read her social media posts (16)       | <input type="radio"/> |
| I find 'NP' likeable (10)                | <input type="radio"/> |
| My impression of 'NP' is favourable (11) | <input type="radio"/> |
| I find 'NP' warm and friendly (12)       | <input type="radio"/> |

Q2.4 How do you feel about 'NP'? Please rate accordingly.

|              | 1 (1)                 | 2 (2)                 | 3 (3)                 | 4 (4)                 | 5 (5)                 |            |
|--------------|-----------------------|-----------------------|-----------------------|-----------------------|-----------------------|------------|
| Unattractive | <input type="radio"/> | Attractive |
| Not classy   | <input type="radio"/> | Classy     |
| Ugly         | <input type="radio"/> | Beautiful  |
| Plain        | <input type="radio"/> | Elegant    |
| Not sexy     | <input type="radio"/> | Sexy       |

Q2.5

How do you feel about 'NP' in regard to her understanding of nutrition? Please rate accordingly.

|                 | 1 (1)                 | 2 (2)                 | 3 (3)                 | 4 (4)                 | 5 (5)                 |               |
|-----------------|-----------------------|-----------------------|-----------------------|-----------------------|-----------------------|---------------|
| Not an expert   | <input type="radio"/> | Expert        |
| Inexperienced   | <input type="radio"/> | Experienced   |
| Unknowledgeable | <input type="radio"/> | Knowledgeable |
| Unqualified     | <input type="radio"/> | Qualified     |
| Unskilled       | <input type="radio"/> | Skilled       |

Q2.6 How much do you agree with the following statements?

|                                                | Strongly disagree (1) | 2 (2)                 | 3 (3)                 | 4 (4)                 | Strongly agree (5)    |
|------------------------------------------------|-----------------------|-----------------------|-----------------------|-----------------------|-----------------------|
| I find 'NP' trustworthy (1)                    | <input type="radio"/> |
| She would be honest in her recommendations (2) | <input type="radio"/> |
| She appears to be dependable (3)               | <input type="radio"/> |
| She seems to be sincere (4)                    | <input type="radio"/> |
| She appears to be reliable (5)                 | <input type="radio"/> |

Q2.7 How much do you agree with the following statements?

|                                                                                                                                | Strongly<br>disagree (1) | 2 (2)                 | 3 (3)                 | 4 (4)                 | Strongly<br>agree (5) |
|--------------------------------------------------------------------------------------------------------------------------------|--------------------------|-----------------------|-----------------------|-----------------------|-----------------------|
| 'NP' tries to act in a manner that is consistent with her held values, even if others criticise or reject her for doing so (1) | <input type="radio"/>    | <input type="radio"/> | <input type="radio"/> | <input type="radio"/> | <input type="radio"/> |
| 'NP' cares about openness and honesty in close relationships with others (2)                                                   | <input type="radio"/>    | <input type="radio"/> | <input type="radio"/> | <input type="radio"/> | <input type="radio"/> |
| In general, 'NP' places a good deal of importance on others understanding who she truly is (3)                                 | <input type="radio"/>    | <input type="radio"/> | <input type="radio"/> | <input type="radio"/> | <input type="radio"/> |
| People can count on 'NP' being who she is regardless of the situation (4)                                                      | <input type="radio"/>    | <input type="radio"/> | <input type="radio"/> | <input type="radio"/> | <input type="radio"/> |

Q2.8 How much do you agree with the following statements?

|                                                                    | Strongly disagree (1) | 2 (2)                 | 3 (3)                 | 4 (4)                 | Strongly agree (5)    |
|--------------------------------------------------------------------|-----------------------|-----------------------|-----------------------|-----------------------|-----------------------|
| 'NP' seems like an expert in healthy eating/diet/fitness (1)       | <input type="radio"/> |
| She is experienced in the topic of healthy eating/diet/fitness (2) | <input type="radio"/> |
| 'NP' is qualified to talk about and give advice on health/food (3) | <input type="radio"/> |
| She is skilled in this area of health/food/fitness (4)             | <input type="radio"/> |
| When it comes to health/food topics, 'NP' is knowledgeable (5)     | <input type="radio"/> |

---

Page Break

End of Block: NutrProf 1 Profile

Start of Block: NutrProf 1 Post 1

Q183 Please answer the following questions about this social media post.

If you are unaware of who 'NP' is, then answer based on your impression from the post.

-----

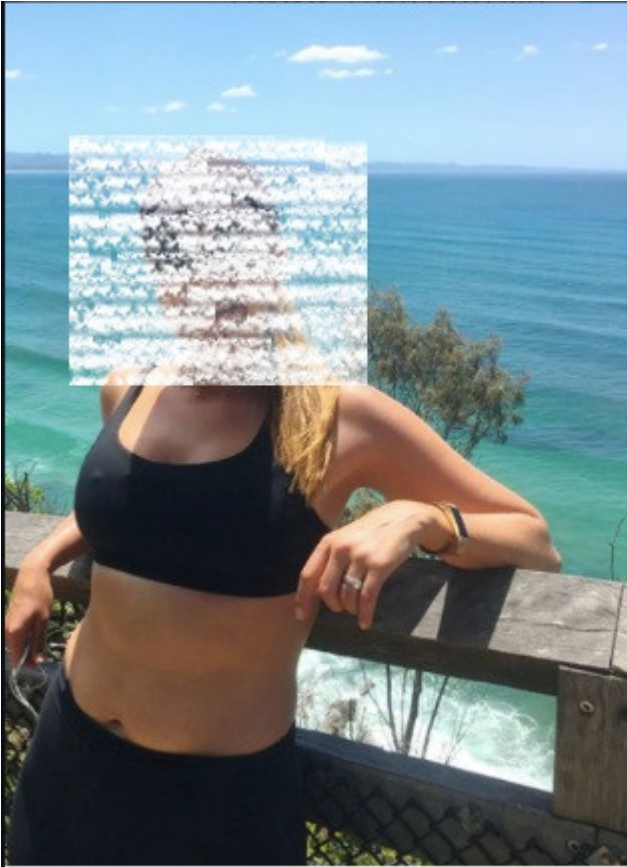

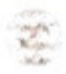

[@NP\\_NutrProf1](#) · [Follow](#)

Hi everyone! I have an extra layer of fat that sits on my muscles. Every time I try to lose it, my body resists. It's a struggle. For years, I tried to lose that weight with diet after diet. Eventually, I have realised that there's actually nothing wrong with my body or my metabolism, and that maybe - I'm just not meant to lose that 'extra' weight.

This 'extra' weight is what keeps my hormones balanced, my mood stable and energy high. This 'extra' weight means I can regulate my temperature easily and sit comfortably thanks to it's cushiness. This so-called 'extra' layer is what keeps me warm at night so I can fall asleep easily. It keeps me going when I get hungry. It's what will protect me if I ever get sick. So it seems this 'extra' weight is not a burden (like I thought), but a security blanket. My body is not broken. My body loved me before I ever loved it and never wanted me to lose this lovely layer. While this extra fat means I'll never be a six-pack, it's a small price to pay to have an energetic, healthy body. Accepting my natural body shape and my healthy weight has been one of the healthiest things I've done for myself. I've realised that this is my natural healthy weight, and I'm not longer willing to fight against it just to fit into people's idea of what a conventional healthy body looks like. This is what a healthy body looks like for me. And I love my layers. #realhealthlookslike #myhealthybody

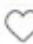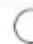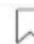

2,686 likes

2 DAYS AGO

Add a comment...

Q3.1

-----

Q3.2 Which emotions do you feel after seeing/reading this post?

|                                                                                                            | Strongly<br>disagree (1) | 2 (2)                 | 3 (3)                 | 4 (4)                 | Strongly<br>agree (5) |
|------------------------------------------------------------------------------------------------------------|--------------------------|-----------------------|-----------------------|-----------------------|-----------------------|
| <b>Affiliation:</b> Feelings of love, belonging and togetherness (1)                                       | <input type="radio"/>    | <input type="radio"/> | <input type="radio"/> | <input type="radio"/> | <input type="radio"/> |
| <b>Hope:</b> Feelings of hope and reassurance (2)                                                          | <input type="radio"/>    | <input type="radio"/> | <input type="radio"/> | <input type="radio"/> | <input type="radio"/> |
| <b>Humour:</b> Feelings of fun, happiness, laughter, joy, light-heartedness, cheerfulness, comedy (3)      | <input type="radio"/>    | <input type="radio"/> | <input type="radio"/> | <input type="radio"/> | <input type="radio"/> |
| <b>Heroic/successful:</b> Feelings of bravery, nobility, admiration (4)                                    | <input type="radio"/>    | <input type="radio"/> | <input type="radio"/> | <input type="radio"/> | <input type="radio"/> |
| <b>Ease/convenience:</b> Feeling that little effort is required to engage in the behaviour in the post (6) | <input type="radio"/>    | <input type="radio"/> | <input type="radio"/> | <input type="radio"/> | <input type="radio"/> |
| <b>Guilt/shame:</b> Feelings of shame and remorse (7)                                                      | <input type="radio"/>    | <input type="radio"/> | <input type="radio"/> | <input type="radio"/> | <input type="radio"/> |
| <b>Sorrow:</b> Feelings of sadness, worry, loss, misery and unhappiness (8)                                | <input type="radio"/>    | <input type="radio"/> | <input type="radio"/> | <input type="radio"/> | <input type="radio"/> |
| <b>Fear:</b> Feelings of terror, dread, anxiety, panic and alarm (9)                                       | <input type="radio"/>    | <input type="radio"/> | <input type="radio"/> | <input type="radio"/> | <input type="radio"/> |

Q3.3 Looking at/reading this social media post, what do you think 'NP' is trying to achieve? How much do you agree with the following statements?

|                                                                                          | Strongly disagree (1) | 2 (2)                 | 3 (3)                 | 4 (4)                 | Strongly agree (5)    |
|------------------------------------------------------------------------------------------|-----------------------|-----------------------|-----------------------|-----------------------|-----------------------|
| 'NP' is trying to sell me something (1)                                                  | <input type="radio"/> |
| 'NP' is encouraging me to do something, such as changing my behaviour for the better (2) | <input type="radio"/> |
| 'NP' is sharing her opinion and feelings about something (3)                             | <input type="radio"/> |
| 'NP' is providing me with useful information and facts about health/food (4)             | <input type="radio"/> |

-----

Q3.4 How much do you agree with the following statements?

|                                                         | Strongly<br>disagree (1) | 2 (2)                 | 3 (3)                 | 4 (4)                 | Strongly<br>agree (5) |
|---------------------------------------------------------|--------------------------|-----------------------|-----------------------|-----------------------|-----------------------|
| The image<br>used for this<br>post is<br>attractive (1) | <input type="radio"/>    | <input type="radio"/> | <input type="radio"/> | <input type="radio"/> | <input type="radio"/> |
| I find this<br>post classy<br>(2)                       | <input type="radio"/>    | <input type="radio"/> | <input type="radio"/> | <input type="radio"/> | <input type="radio"/> |
| This post is<br>plain (3)                               | <input type="radio"/>    | <input type="radio"/> | <input type="radio"/> | <input type="radio"/> | <input type="radio"/> |
| The image<br>used for this<br>post is sexy<br>(4)       | <input type="radio"/>    | <input type="radio"/> | <input type="radio"/> | <input type="radio"/> | <input type="radio"/> |
| I find the<br>image in this<br>post beautiful<br>(5)    | <input type="radio"/>    | <input type="radio"/> | <input type="radio"/> | <input type="radio"/> | <input type="radio"/> |

---

Q3.5 How much do you agree with the following statements?

|                                                           | Strongly disagree (1) | 2 (2)                 | 3 (3)                 | 4 (4)                 | Strongly agree (5)    |
|-----------------------------------------------------------|-----------------------|-----------------------|-----------------------|-----------------------|-----------------------|
| The content of this post seems dependable (1)             | <input type="radio"/> |
| I find the information provided in this post reliable (2) | <input type="radio"/> |
| This post is being honest in its recommendations (3)      | <input type="radio"/> |
| This post seems sincere (4)                               | <input type="radio"/> |
| I trust the information provided in this post (5)         | <input type="radio"/> |

Q3.6 How much do you agree with the following statements?

|                                               | Strongly disagree (1) | 2 (2)                 | 3 (3)                 | 4 (4)                 | Strongly agree (5)    |
|-----------------------------------------------|-----------------------|-----------------------|-----------------------|-----------------------|-----------------------|
| The content in this post is genuine (1)       | <input type="radio"/> |
| The content in this post seems real to me (2) | <input type="radio"/> |
| This content in this post is authentic (3)    | <input type="radio"/> |

Q3.7 What emotions do you think the post is trying to show?

|                                                                                                            | Strongly<br>disagree (1) | 2 (2)                 | 3 (3)                 | 4 (4)                 | Strongly<br>agree (5) |
|------------------------------------------------------------------------------------------------------------|--------------------------|-----------------------|-----------------------|-----------------------|-----------------------|
| <b>Affiliation:</b> Feelings of love, belonging and togetherness (1)                                       | <input type="radio"/>    | <input type="radio"/> | <input type="radio"/> | <input type="radio"/> | <input type="radio"/> |
| <b>Hope:</b> Feelings of hope and reassurance (2)                                                          | <input type="radio"/>    | <input type="radio"/> | <input type="radio"/> | <input type="radio"/> | <input type="radio"/> |
| <b>Humour:</b> Feelings of fun, happiness, laughter, joy, light-heartedness, cheerfulness, comedy (3)      | <input type="radio"/>    | <input type="radio"/> | <input type="radio"/> | <input type="radio"/> | <input type="radio"/> |
| <b>Heroism/success:</b> Feelings of bravery, nobility, admiration (4)                                      | <input type="radio"/>    | <input type="radio"/> | <input type="radio"/> | <input type="radio"/> | <input type="radio"/> |
| <b>Ease/convenience:</b> Feeling that little effort is required to engage in the behaviour in the post (6) | <input type="radio"/>    | <input type="radio"/> | <input type="radio"/> | <input type="radio"/> | <input type="radio"/> |
| <b>Guilt/shame:</b> Feelings of shame and remorse (7)                                                      | <input type="radio"/>    | <input type="radio"/> | <input type="radio"/> | <input type="radio"/> | <input type="radio"/> |
| <b>Sorrow:</b> Feelings of sadness, worry, loss, misery and unhappiness (8)                                | <input type="radio"/>    | <input type="radio"/> | <input type="radio"/> | <input type="radio"/> | <input type="radio"/> |
| <b>Fear:</b> Feelings of terror, dread, anxiety, panic and alarm (9)                                       | <input type="radio"/>    | <input type="radio"/> | <input type="radio"/> | <input type="radio"/> | <input type="radio"/> |

End of Block: NutrProf 1 Post 1

Start of Block: NutrProf 1 Post 2

Q184 Please answer the following questions about this social media post.

If you are unaware of who 'NP' is, then answer based on your impression from the post.

Q4.1

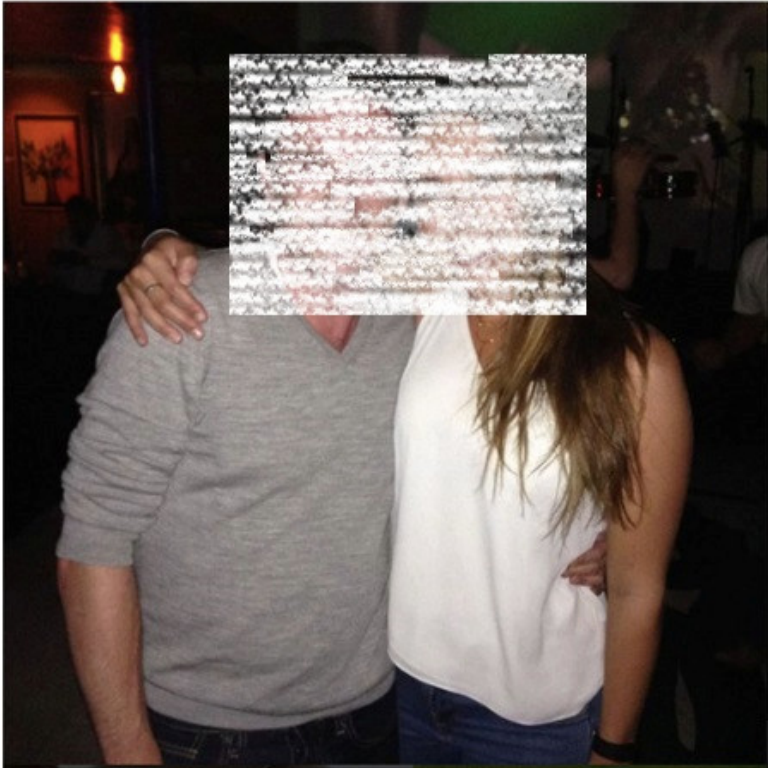

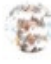 maddie\_petrifield · Follow

maddie\_petrifield · Six years with this guy! Married for two. He doesn't even have Instagram but I wanted you guys to know something. I know I'm not meant to say this kinda thing but this guy... He loved me before I loved myself. Or should I say, he loved my body before I loved my body. We met when I was at my heaviest weight. I hated my body yet he told me he loved me no matter what I weighed. He told me that my body was perfect the way it is. And I think I knew I'd marry him from that moment.

It hit me hard because I realised that I didn't yet love myself in that way. I had put conditions on my own self-acceptance telling myself that only "When you lose weight, you will be ok". His word triggered me to start working toward loving myself and over the past few years I've put in the work to get to a point when I know deep down that I am worthy. No matter what I weigh, or achieve or look like. Being loved exactly as you are - no strings attached... well, it's life-changing.

So, I want put a idea out there for you. You don't need to wait for someone else to love you and accept you, like I waited (for too long). You don't even need to believe in it yet, you only have to believe that it's a goal worth working toward. Simply decide that loving yourself unconditionally is a goal worth working for. Once you realise that it's something you want and deserve, you can start making the changes you need to get there.

[www.lyndiecohen.com](http://www.lyndiecohen.com)  
#bodylove #selfacceptance  
#bodyacceptance

**1,684 likes**

JULY 19

Q4.2 Which emotions do you feel after seeing/reading this post?

|                                                                                                            | Strongly<br>disagree (1) | 2 (2)                 | 3 (3)                 | 4 (4)                 | Strongly<br>agree (5) |
|------------------------------------------------------------------------------------------------------------|--------------------------|-----------------------|-----------------------|-----------------------|-----------------------|
| <b>Affiliation:</b> Feelings of love, belonging and togetherness (1)                                       | <input type="radio"/>    | <input type="radio"/> | <input type="radio"/> | <input type="radio"/> | <input type="radio"/> |
| <b>Hope:</b> Feelings of hope and reassurance (2)                                                          | <input type="radio"/>    | <input type="radio"/> | <input type="radio"/> | <input type="radio"/> | <input type="radio"/> |
| <b>Humour:</b> Feelings of fun, happiness, laughter, joy, light-heartedness, cheerfulness, comedy (3)      | <input type="radio"/>    | <input type="radio"/> | <input type="radio"/> | <input type="radio"/> | <input type="radio"/> |
| <b>Heroic/successful:</b> Feelings of bravery, nobility, admiration (4)                                    | <input type="radio"/>    | <input type="radio"/> | <input type="radio"/> | <input type="radio"/> | <input type="radio"/> |
| <b>Ease/convenience:</b> Feeling that little effort is required to engage in the behaviour in the post (6) | <input type="radio"/>    | <input type="radio"/> | <input type="radio"/> | <input type="radio"/> | <input type="radio"/> |
| <b>Guilt/shame:</b> Feelings of shame and remorse (7)                                                      | <input type="radio"/>    | <input type="radio"/> | <input type="radio"/> | <input type="radio"/> | <input type="radio"/> |
| <b>Sorrow:</b> Feelings of sadness, worry, loss, misery and unhappiness (8)                                | <input type="radio"/>    | <input type="radio"/> | <input type="radio"/> | <input type="radio"/> | <input type="radio"/> |
| <b>Fear:</b> Feelings of terror, dread, anxiety, panic and alarm (9)                                       | <input type="radio"/>    | <input type="radio"/> | <input type="radio"/> | <input type="radio"/> | <input type="radio"/> |

Q4.3 Looking/reading this social media post, what do you think 'NP' is trying to achieve? How much do you agree with the following statements?

|                                                                                          | Strongly disagree (1) | 2 (2)                 | 3 (3)                 | 4 (4)                 | Strongly agree (5)    |
|------------------------------------------------------------------------------------------|-----------------------|-----------------------|-----------------------|-----------------------|-----------------------|
| 'NP' is trying to sell me something (1)                                                  | <input type="radio"/> |
| 'NP' is encouraging me to do something, such as changing my behaviour for the better (2) | <input type="radio"/> |
| 'NP' is sharing her opinion and feelings about something (3)                             | <input type="radio"/> |
| 'NP' is providing me with useful information and facts about health/food (4)             | <input type="radio"/> |

Q4.4 How much do you agree with the following statements?

|                                                           | Strongly disagree<br>(11) | 2 (13)                | 3 (14)                | 4 (18)                | Strongly agree (19)   |
|-----------------------------------------------------------|---------------------------|-----------------------|-----------------------|-----------------------|-----------------------|
| The content of this post seems dependable (1)             | <input type="radio"/>     | <input type="radio"/> | <input type="radio"/> | <input type="radio"/> | <input type="radio"/> |
| I find the information provided in this post reliable (2) | <input type="radio"/>     | <input type="radio"/> | <input type="radio"/> | <input type="radio"/> | <input type="radio"/> |
| This post is being honest in its recommendations (3)      | <input type="radio"/>     | <input type="radio"/> | <input type="radio"/> | <input type="radio"/> | <input type="radio"/> |
| This post seems sincere (4)                               | <input type="radio"/>     | <input type="radio"/> | <input type="radio"/> | <input type="radio"/> | <input type="radio"/> |
| I trust the information provided in this post (5)         | <input type="radio"/>     | <input type="radio"/> | <input type="radio"/> | <input type="radio"/> | <input type="radio"/> |

-----

Q4.5 How much do you agree with the following statements?

|                                                         | Strongly<br>disagree (1) | 2 (2)                 | 3 (3)                 | 4 (4)                 | Strongly<br>agree (5) |
|---------------------------------------------------------|--------------------------|-----------------------|-----------------------|-----------------------|-----------------------|
| The image<br>used for this<br>post is<br>attractive (1) | <input type="radio"/>    | <input type="radio"/> | <input type="radio"/> | <input type="radio"/> | <input type="radio"/> |
| I find this<br>post classy<br>(2)                       | <input type="radio"/>    | <input type="radio"/> | <input type="radio"/> | <input type="radio"/> | <input type="radio"/> |
| This post is<br>plain (3)                               | <input type="radio"/>    | <input type="radio"/> | <input type="radio"/> | <input type="radio"/> | <input type="radio"/> |
| The image<br>used for this<br>post is sexy<br>(4)       | <input type="radio"/>    | <input type="radio"/> | <input type="radio"/> | <input type="radio"/> | <input type="radio"/> |
| I find the<br>image in this<br>post beautiful<br>(5)    | <input type="radio"/>    | <input type="radio"/> | <input type="radio"/> | <input type="radio"/> | <input type="radio"/> |

Q4.6 How much do you agree with the following statements?

|                                                        | Strongly<br>disagree (1) | 2 (2)                 | 3 (3)                 | 4 (4)                 | Strongly<br>agree (5) |
|--------------------------------------------------------|--------------------------|-----------------------|-----------------------|-----------------------|-----------------------|
| The content<br>in this post is<br>genuine (1)          | <input type="radio"/>    | <input type="radio"/> | <input type="radio"/> | <input type="radio"/> | <input type="radio"/> |
| The content<br>in this post<br>seems real to<br>me (2) | <input type="radio"/>    | <input type="radio"/> | <input type="radio"/> | <input type="radio"/> | <input type="radio"/> |
| The content<br>in this post is<br>authentic (3)        | <input type="radio"/>    | <input type="radio"/> | <input type="radio"/> | <input type="radio"/> | <input type="radio"/> |

Q4.7 What emotions do you think the post is trying to show?

|                                                                                                            | Strongly<br>disagree (1) | 2 (2)                 | 3 (3)                 | 4 (4)                 | Strongly<br>agree (5) |
|------------------------------------------------------------------------------------------------------------|--------------------------|-----------------------|-----------------------|-----------------------|-----------------------|
| <b>Affiliation:</b> Feelings of love, belonging and togetherness (1)                                       | <input type="radio"/>    | <input type="radio"/> | <input type="radio"/> | <input type="radio"/> | <input type="radio"/> |
| <b>Hope:</b> Feelings of hope and reassurance (2)                                                          | <input type="radio"/>    | <input type="radio"/> | <input type="radio"/> | <input type="radio"/> | <input type="radio"/> |
| <b>Humour:</b> Feelings of fun, happiness, laughter, joy, light-heartedness, cheerfulness, comedy (3)      | <input type="radio"/>    | <input type="radio"/> | <input type="radio"/> | <input type="radio"/> | <input type="radio"/> |
| <b>Heroism/success:</b> Feelings of bravery, nobility, admiration (4)                                      | <input type="radio"/>    | <input type="radio"/> | <input type="radio"/> | <input type="radio"/> | <input type="radio"/> |
| <b>Ease/convenience:</b> Feeling that little effort is required to engage in the behaviour in the post (6) | <input type="radio"/>    | <input type="radio"/> | <input type="radio"/> | <input type="radio"/> | <input type="radio"/> |
| <b>Guilt/shame:</b> Feelings of shame and remorse (7)                                                      | <input type="radio"/>    | <input type="radio"/> | <input type="radio"/> | <input type="radio"/> | <input type="radio"/> |
| <b>Sorrow:</b> Feelings of sadness, worry, loss, misery and unhappiness (8)                                | <input type="radio"/>    | <input type="radio"/> | <input type="radio"/> | <input type="radio"/> | <input type="radio"/> |
| <b>Fear:</b> Feelings of terror, dread, anxiety, panic and alarm (9)                                       | <input type="radio"/>    | <input type="radio"/> | <input type="radio"/> | <input type="radio"/> | <input type="radio"/> |

End of Block: NutrProf 1 Post 2

Start of Block: 1. Demographics

Q8.1 Please tell us a little bit about yourself.

-----

Q8.2 What is your age?

☐ 18 (46)

☐ 19 (65)

☐ 20 (66)

☐ 21 (67)

☐ 22 (68)

☐ 23 (69)

☐ 24 (70)

☐ 25 (71)

☐ 26 (72)

☐ 27 (73)

☐ 28 (74)

☐ 29 (75)

☐ 30 (76)

☐ 31 (77)

☐ 32 (78)

☐ 33 (79)

☐ 34 (80)

☐ 35 (81)

☐ 36 (82)

☐ 37 (83)

☐ 38 (84)

- ☐ 39 (85)
- ☐ 40 (86)
- ☐ 41 (87)
- ☐ 42 (88)
- ☐ 43 (89)
- ☐ 44 (90)
- ☐ 45 (91)
- ☐ 46 (92)
- ☐ 47 (93)
- ☐ 48 (94)
- ☐ 49 (95)
- ☐ 50 (96)
- ☐ 51 (97)
- ☐ 52 (98)
- ☐ 53 (99)
- ☐ 54 (100)
- ☐ 55 (101)
- ☐ 56 (102)
- ☐ 57 (103)
- ☐ 58 (104)
- ☐ 59 (105)

- ☐ 60 (106)
  - ☐ 61 (107)
  - ☐ 62 (108)
  - ☐ 63 (109)
  - ☐ 64 (110)
  - ☐ >65 (111)
- 

Q8.3 I identify as...

- ☐ Male (1)
  - ☐ Female (2)
  - ☐ Trans male/trans man (3)
  - ☐ Trans female/trans woman (4)
  - ☐ Non-binary/gender fluid (5)
  - ☐ My gender is not listed (6) \_\_\_\_\_
  - ☐ Prefer not to say (7)
- 

Q8.4 What country were you born in?

- ☐ Australia (1)
  - ☐ Other (2)
-

*Display This Question:*

*If What country were you born in? = Other*

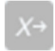

Q8.5 Other, please specify

- ☐ Afghanistan (1)
- ☐ Albania (2)
- ☐ Algeria (3)
- ☐ Andorra (4)
- ☐ Angola (5)
- ☐ Antigua and Barbuda (6)
- ☐ Argentina (7)
- ☐ Armenia (8)
- ☐ Australia (9)
- ☐ Austria (10)
- ☐ Azerbaijan (11)
- ☐ Bahamas (12)
- ☐ Bahrain (13)
- ☐ Bangladesh (14)
- ☐ Barbados (15)
- ☐ Belarus (16)
- ☐ Belgium (17)
- ☐ Belize (18)
- ☐ Benin (19)
- ☐ Bhutan (20)
- ☐ Bolivia (21)

- ☐ Bosnia and Herzegovina (22)
- ☐ Botswana (23)
- ☐ Brazil (24)
- ☐ Brunei Darussalam (25)
- ☐ Bulgaria (26)
- ☐ Burkina Faso (27)
- ☐ Burundi (28)
- ☐ Cambodia (29)
- ☐ Cameroon (30)
- ☐ Canada (31)
- ☐ Cape Verde (32)
- ☐ Central African Republic (33)
- ☐ Chad (34)
- ☐ Chile (35)
- ☐ China (36)
- ☐ Colombia (37)
- ☐ Comoros (38)
- ☐ Congo, Republic of the... (39)
- ☐ Costa Rica (40)
- ☐ Côte d'Ivoire (41)
- ☐ Croatia (42)

- ☐ Cuba (43)
- ☐ Cyprus (44)
- ☐ Czech Republic (45)
- ☐ Democratic People's Republic of Korea (46)
- ☐ Democratic Republic of the Congo (47)
- ☐ Denmark (48)
- ☐ Djibouti (49)
- ☐ Dominica (50)
- ☐ Dominican Republic (51)
- ☐ Ecuador (52)
- ☐ Egypt (53)
- ☐ El Salvador (54)
- ☐ Equatorial Guinea (55)
- ☐ Eritrea (56)
- ☐ Estonia (57)
- ☐ Ethiopia (58)
- ☐ Fiji (59)
- ☐ Finland (60)
- ☐ France (61)
- ☐ Gabon (62)
- ☐ Gambia (63)

- ☐ Georgia (64)
- ☐ Germany (65)
- ☐ Ghana (66)
- ☐ Greece (67)
- ☐ Grenada (68)
- ☐ Guatemala (69)
- ☐ Guinea (70)
- ☐ Guinea-Bissau (71)
- ☐ Guyana (72)
- ☐ Haiti (73)
- ☐ Honduras (74)
- ☐ Hong Kong (S.A.R.) (75)
- ☐ Hungary (76)
- ☐ Iceland (77)
- ☐ India (78)
- ☐ Indonesia (79)
- ☐ Iran, Islamic Republic of... (80)
- ☐ Iraq (81)
- ☐ Ireland (82)
- ☐ Israel (83)
- ☐ Italy (84)

- ☐ Jamaica (85)
- ☐ Japan (86)
- ☐ Jordan (87)
- ☐ Kazakhstan (88)
- ☐ Kenya (89)
- ☐ Kiribati (90)
- ☐ Kuwait (91)
- ☐ Kyrgyzstan (92)
- ☐ Lao People's Democratic Republic (93)
- ☐ Latvia (94)
- ☐ Lebanon (95)
- ☐ Lesotho (96)
- ☐ Liberia (97)
- ☐ Libyan Arab Jamahiriya (98)
- ☐ Liechtenstein (99)
- ☐ Lithuania (100)
- ☐ Luxembourg (101)
- ☐ Madagascar (102)
- ☐ Malawi (103)
- ☐ Malaysia (104)
- ☐ Maldives (105)

- ☐ Mali (106)
- ☐ Malta (107)
- ☐ Marshall Islands (108)
- ☐ Mauritania (109)
- ☐ Mauritius (110)
- ☐ Mexico (111)
- ☐ Micronesia, Federated States of... (112)
- ☐ Monaco (113)
- ☐ Mongolia (114)
- ☐ Montenegro (115)
- ☐ Morocco (116)
- ☐ Mozambique (117)
- ☐ Myanmar (118)
- ☐ Namibia (119)
- ☐ Nauru (120)
- ☐ Nepal (121)
- ☐ Netherlands (122)
- ☐ New Zealand (123)
- ☐ Nicaragua (124)
- ☐ Niger (125)
- ☐ Nigeria (126)

- ☐ North Korea (127)
- ☐ Norway (128)
- ☐ Oman (129)
- ☐ Pakistan (130)
- ☐ Palau (131)
- ☐ Panama (132)
- ☐ Papua New Guinea (133)
- ☐ Paraguay (134)
- ☐ Peru (135)
- ☐ Philippines (136)
- ☐ Poland (137)
- ☐ Portugal (138)
- ☐ Qatar (139)
- ☐ Republic of Korea (140)
- ☐ Republic of Moldova (141)
- ☐ Romania (142)
- ☐ Russian Federation (143)
- ☐ Rwanda (144)
- ☐ Saint Kitts and Nevis (145)
- ☐ Saint Lucia (146)
- ☐ Saint Vincent and the Grenadines (147)

- ☐ Samoa (148)
- ☐ San Marino (149)
- ☐ Sao Tome and Principe (150)
- ☐ Saudi Arabia (151)
- ☐ Senegal (152)
- ☐ Serbia (153)
- ☐ Seychelles (154)
- ☐ Sierra Leone (155)
- ☐ Singapore (156)
- ☐ Slovakia (157)
- ☐ Slovenia (158)
- ☐ Solomon Islands (159)
- ☐ Somalia (160)
- ☐ South Africa (161)
- ☐ South Korea (162)
- ☐ Spain (163)
- ☐ Sri Lanka (164)
- ☐ Sudan (165)
- ☐ Suriname (166)
- ☐ Swaziland (167)
- ☐ Sweden (168)

- ☐ Switzerland (169)
- ☐ Syrian Arab Republic (170)
- ☐ Tajikistan (171)
- ☐ Thailand (172)
- ☐ The former Yugoslav Republic of Macedonia (173)
- ☐ Timor-Leste (174)
- ☐ Togo (175)
- ☐ Tonga (176)
- ☐ Trinidad and Tobago (177)
- ☐ Tunisia (178)
- ☐ Turkey (179)
- ☐ Turkmenistan (180)
- ☐ Tuvalu (181)
- ☐ Uganda (182)
- ☐ Ukraine (183)
- ☐ United Arab Emirates (184)
- ☐ United Kingdom of Great Britain and Northern Ireland (185)
- ☐ United Republic of Tanzania (186)
- ☐ United States of America (187)
- ☐ Uruguay (188)
- ☐ Uzbekistan (189)

- ☐ Vanuatu (190)
- ☐ Venezuela, Bolivarian Republic of... (191)
- ☐ Viet Nam (192)
- ☐ Yemen (193)
- ☐ Zambia (580)
- ☐ Zimbabwe (1357)

Display This Question:  
If What country were you born in? = Other

JS

Q8.6 What year did you arrive in Australia?

|                                 |
|---------------------------------|
| Y<br>e<br>a<br>r<br>(<br>3<br>) |
|---------------------------------|

(Table Truncated to 63 Columns)

Page Break

Q8.7 I am currently...

- ☐ Working full-time (1)
  - ☐ Working part-time (2)
  - ☐ Working casually (3)
  - ☐ Not working (4)
  - ☐ Prefer not to say (5)
- 

Q8.8 I am currently...

- ☐ Studying full-time (1)
  - ☐ Studying part-time (2)
  - ☐ Prefer not to say (4)
- 

*Display This Question:*

*If I am currently... = Working full-time*  
*Or I am currently... = Working part-time*  
*Or I am currently... = Working casually*

Q8.9 What is your occupation?

- ☐ Professional eg. Teacher, Nurse, Accountant, Engineer, Journalist (1)
  - ☐ Clerical or Administrative Worker eg. Secretary, Numerical clerk, Personal assistant (2)
  - ☐ Technician or Trades Worker eg. Carpenter, Plumber, Mechanic, Science technician (3)
  - ☐ Manager eg. General manager, Construction manager, Retail manager, Farm manager (4)
  - ☐ Community or Personal Service Worker eg. Hospitality worker, Carer, Personal trainer, Health care support (5)
  - ☐ Labourer eg. Cleaner, Food preparation assistant, Factory process worker, Building or plumbing labourer (6)
  - ☐ Sales Worker eg. Sales representative, Sales assistant (7)
  - ☐ Machinery Operator or Driver eg. Machine operator, Road or rail driver (8)
  - ☐ Prefer not to say (10)
-

Q8.10 What is your **weekly** gross income (**before** tax, superannuation, salary sacrifice and any other automatic deductions)?

- ☐ No income (1)
  - ☐ \$1 - \$149 weekly (\$1-\$7,799 per year) (2)
  - ☐ \$150 - \$299 weekly (\$7,800-\$15,599 per year) (3)
  - ☐ \$300 - \$399 weekly (\$15,600-\$20,799 per year) (4)
  - ☐ \$400 - \$499 weekly (\$20,800-\$25,999 per year) (5)
  - ☐ \$500 - \$649 weekly (\$26,000-\$33,799 per year) (6)
  - ☐ \$650 - \$799 weekly (\$33,800-\$41,599 per year) (7)
  - ☐ \$800 - \$999 weekly (\$41,600-\$51,999 per year) (8)
  - ☐ \$1,000 - \$1,249 weekly (\$52,000-\$64,999 per year) (9)
  - ☐ \$1,250 - \$1,499 weekly (\$65,000-\$77,999 per year) (10)
  - ☐ \$1,500 - \$1,749 weekly (\$78,000-\$90,999 per year) (11)
  - ☐ \$1,750 - \$1,999 weekly (\$91,000-\$103,999 per year) (12)
  - ☐ \$2,000 - \$2,999 weekly (\$104,000-\$155,999 per year) (13)
  - ☐ \$3,000 or more weekly (\$156,000 or more per year) (14)
  - ☐ Prefer not to say (15)
-

Q8.11 Who do you live with currently? (Please tick all that apply)

- ☐ Alone (1)
- ☐ Parent(s) (2)
- ☐ My partner (3)
- ☐ Friend(s)/housemate(s) (4)
- ☐ My child(ren) (5)
- ☐ Other family (6)
- ☐ I don't wish to say (7)

---

Page Break

Q8.12 As this survey is about healthy eating lifestyles, we would like to know your weight and height as a way to estimate body mass index (BMI). Please be assured that your responses will remain anonymous and confidential.

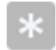

Q8.13 Your weight in kilograms (kg)

---

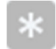

Q8.14 Your height in centimetres (cm)

---

End of Block: 1. Demographics

---

Start of Block: 2. Quality of life and physical activity

Q9.1

Please tell us more about your health related values and physical activity level.

Q9.2 Please rate the following questions based on your satisfaction.

|                                                                 | Very poor /<br>very<br>dissatisfied<br>(1) | 2 (2)                 | 3 (3)                 | 4 (4)                 | Very good /<br>very satisfied<br>(5) |
|-----------------------------------------------------------------|--------------------------------------------|-----------------------|-----------------------|-----------------------|--------------------------------------|
| How satisfied are you with what you are achieving in life? (13) | <input type="radio"/>                      | <input type="radio"/> | <input type="radio"/> | <input type="radio"/> | <input type="radio"/>                |
| How satisfied are you with feeling part of your community? (6)  | <input type="radio"/>                      | <input type="radio"/> | <input type="radio"/> | <input type="radio"/> | <input type="radio"/>                |
| How satisfied are you with your future security? (9)            | <input type="radio"/>                      | <input type="radio"/> | <input type="radio"/> | <input type="radio"/> | <input type="radio"/>                |
| How satisfied are you with your spirituality or religion? (10)  | <input type="radio"/>                      | <input type="radio"/> | <input type="radio"/> | <input type="radio"/> | <input type="radio"/>                |

Q9.3 Would you say that you are physically more active, less active or about as active as other persons your age?

- ☐ More (1)
- ☐ Less (2)
- ☐ Same (3)

End of Block: 2. Quality of life and physical activity

Start of Block: 3. Healthy eating and consumption

Q10.1 Please tell us more about your diet and health-related beliefs.

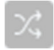

Q10.2 Which of these statements do you identify with the most? (Choose **one**)

- ☐ **I'm passionate about healthy eating and health plays a big part in my life.** I use social media to follow active lifestyle personalities or get new recipes/exercise ideas. I may even buy superfoods or follow a particular type of diet. I like to think I am super healthy. (1)
- ☐ **I'm health-conscious and being healthy and eating healthy is important to me.** Although health means different things to different people, I make conscious lifestyle decisions about eating based on what I believe healthy means. I look for new recipes and healthy eating information on social media. (2)
- ☐ **I aspire to be healthy (but struggle sometimes).** Healthy eating is hard work! I've tried to improve my diet, but always find things that make it difficult to stick with the changes. Sometimes I notice recipe ideas or healthy eating hacks, and if it seems easy enough, I'll give it a go. (3)
- ☐ **I try and live a balanced lifestyle, and I think that all foods are okay in moderation.** I shouldn't have to feel guilty about eating a piece of cake now and again. I get all sorts of inspiration from social media like finding out about new restaurants, fun recipes and sometimes healthy eating tips. (4)
- ☐ **I'm contemplating healthy eating but it's not a priority for me right now.** I know the basics about what it means to be healthy, but it doesn't seem relevant to me right now. I have taken a few steps to be healthier but I am not motivated to make it a high priority because I have too many other things going on in my life. (5)
- ☐ **I'm not bothered about healthy eating.** I don't really see the point and I don't think about it. I don't really notice healthy eating tips or recipes and I don't care what I eat. (6)
- 

Page Break

Q10.3 How much do you agree/disagree with the following statements about healthy eating?

|                                                                          | Strongly<br>disagree (1) | 2 (2)                 | 3 (3)                 | 4 (4)                 | Strongly<br>agree (5) |
|--------------------------------------------------------------------------|--------------------------|-----------------------|-----------------------|-----------------------|-----------------------|
| I know quite a bit about healthy eating (1)                              | <input type="radio"/>    | <input type="radio"/> | <input type="radio"/> | <input type="radio"/> | <input type="radio"/> |
| I do not feel very knowledgeable about healthy eating (2)                | <input type="radio"/>    | <input type="radio"/> | <input type="radio"/> | <input type="radio"/> | <input type="radio"/> |
| When it comes to healthy eating, I really don't know a lot (3)           | <input type="radio"/>    | <input type="radio"/> | <input type="radio"/> | <input type="radio"/> | <input type="radio"/> |
| In my circle of friends, I am one of the "experts" on healthy eating (4) | <input type="radio"/>    | <input type="radio"/> | <input type="radio"/> | <input type="radio"/> | <input type="radio"/> |
| Compared to most people, I know less about healthy eating (5)            | <input type="radio"/>    | <input type="radio"/> | <input type="radio"/> | <input type="radio"/> | <input type="radio"/> |
| People seek me out for information on healthy eating (6)                 | <input type="radio"/>    | <input type="radio"/> | <input type="radio"/> | <input type="radio"/> | <input type="radio"/> |

Q11.1 How much do you agree/disagree with the following statements about the healthiness of your diet?

|                                                                        | Strongly disagree (1) | 2 (2)                 | 3 (3)                 | 4 (4)                 | Strongly agree (5)    |
|------------------------------------------------------------------------|-----------------------|-----------------------|-----------------------|-----------------------|-----------------------|
| I currently eat healthily (1)                                          | <input type="radio"/> |
| I am satisfied with the healthiness of my diet (2)                     | <input type="radio"/> |
| I don't need to improve the healthiness of my diet (6)                 | <input type="radio"/> |
| I intend to improve the healthiness of my diet over the next month (3) | <input type="radio"/> |
| I plan to eat a healthier diet over the next month (4)                 | <input type="radio"/> |
| I want to eat a healthier diet over the next month (5)                 | <input type="radio"/> |

Page Break

End of Block: 3. Healthy eating and consumption

Start of Block: 5. Online and social media behaviour

Q12.1 Please tell us more about your social media usage and online behaviour.

Q12.2 How much do you agree with the following statements about social media?

|                                                                                         | Strongly disagree (1) | 2 (2)                 | 3 (3)                 | 4 (4)                 | Strongly agree (5)    |
|-----------------------------------------------------------------------------------------|-----------------------|-----------------------|-----------------------|-----------------------|-----------------------|
| Social media helps me to be the type of person I want to be (6)                         | <input type="radio"/> |
| My social media profile is the real 'me' (7)                                            | <input type="radio"/> |
| My social media profile is what I want people to see about me (8)                       | <input type="radio"/> |
| I have different social media profiles depending on the type of social media I use (16) | <input type="radio"/> |

Q12.3 How much do you agree/disagree with the following statements?

|                                                                                                            | Strongly<br>disagree (1) | 2 (2)                 | 3 (3)                 | 4 (4)                 | Strongly<br>agree (5) |
|------------------------------------------------------------------------------------------------------------|--------------------------|-----------------------|-----------------------|-----------------------|-----------------------|
| I find seeing other people's health experiences on social media beneficial to my own health experience (1) | <input type="radio"/>    | <input type="radio"/> | <input type="radio"/> | <input type="radio"/> | <input type="radio"/> |
| I can access expert health advice on social media without attending a clinic (2)                           | <input type="radio"/>    | <input type="radio"/> | <input type="radio"/> | <input type="radio"/> | <input type="radio"/> |
| The internet is a good way of finding other people who are experiencing similar health problems (3)        | <input type="radio"/>    | <input type="radio"/> | <input type="radio"/> | <input type="radio"/> | <input type="radio"/> |
| It can be helpful to see other people's health-related experiences on the internet (4)                     | <input type="radio"/>    | <input type="radio"/> | <input type="radio"/> | <input type="radio"/> | <input type="radio"/> |

End of Block: 5. Online and social media behaviour

---

Start of Block: End of survey

Q13.1 Thank you for taking the time to complete this survey.

If you would like further information or assistance you can contact one of the researchers:

Tracy McCaffrey: [tracy.mccaffrey@monash.edu](mailto:tracy.mccaffrey@monash.edu)

Eva Jenkins: [eljen4@student.monash.edu](mailto:eljen4@student.monash.edu)

Jasmina Ilicic: [jasmina.ilicic@monash.edu](mailto:jasmina.ilicic@monash.edu)

Annika Molenaar: [annika.molenaar@monash.edu](mailto:annika.molenaar@monash.edu)

Or one of the following services:

- Monash Nutrition Clinic for further information on your diet:

<https://www.monash.edu/medicine/base/about/clinics/nutrition-clinic>

- Monash counselling services:

<https://www.monash.edu/health/counselling>

- Lifeline phone line: 13 11 14

- Butterfly foundation phone line: 1800 33 4673

Please click the **SUBMIT SURVEY** button below to exit the survey.

End of Block: End of survey

---
